# Supplementary material for: Dehydrogenation of propane over PtSnAl/SBA-15 catalysts: Al addition effect and coke formation analysis
Source: Royal Society of Chemistry journal article supplement (doi:10.1039/c4cy00951g), 2014-08-22
Supplement: c4cy00951g1.pdf [file c4cy00951g1.pdf]

# Dehydrogenation of Propane over PtSnAl/SBA-15 Catalysts: Al-addition Effect and Coke Formation Analysis

Xiaoqiang Fan, Jianmei Li<sup>†</sup>, Zhen Zhao\*, Yuechang Wei, Jian Liu\*, Aijun Duan and  
Guiyuan Jiang

*State Key Laboratory of Heavy Oil Processing, China University of Petroleum, Beijing,  
102249, P. R. China*

Corresponding authors:

\* E-mail zhenzhao@cup.edu.cn; Tel: 86-10-89731586; Fax: 86-10-69724721

\* E-mail liujian@cup.edu.cn; Tel: 86-10-89732326; Fax: 86-10-69724721

## Supplementary Information

### Table of content:

**Fig. S1** The suggested model of the coordination states of Sn and acidity of PtSnAl/SBA-15 system.

**Fig. S2** The performance comparison of (A) PtSnAl<sub>0</sub>/SBA-15 and (B) PtSnAl<sub>0.2</sub>/SBA-15 catalysts for propane dehydrogenation.

**Fig. S3** FT-IR spectra of PtSnAl/SBA-15 catalysts: (a) PtSnAl<sub>0</sub>/SBA-15, (b) PtSnAl<sub>0.1</sub>/SBA-15, (c) PtSnAl<sub>0.2</sub>/SBA-15, (d) PtSnAl<sub>0.3</sub>/SBA-15, (e) PtSnAl<sub>0.4</sub>/SBA-15.

**Table S1** A comparison of catalytic performance over different catalysts for propane dehydrogenation to produce propene

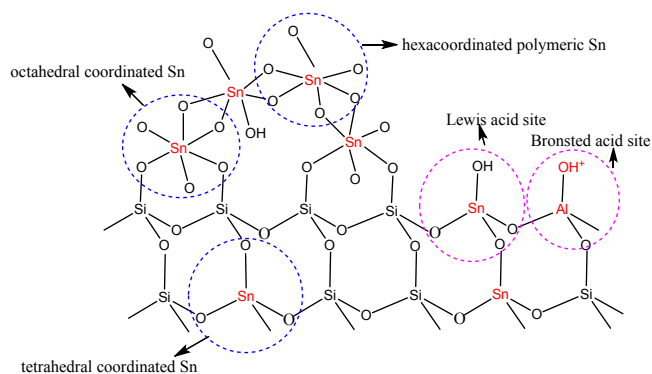

**Fig. S1** The suggested model of the coordination states of Sn and acidity of PtSnAl/SBA-15 system.

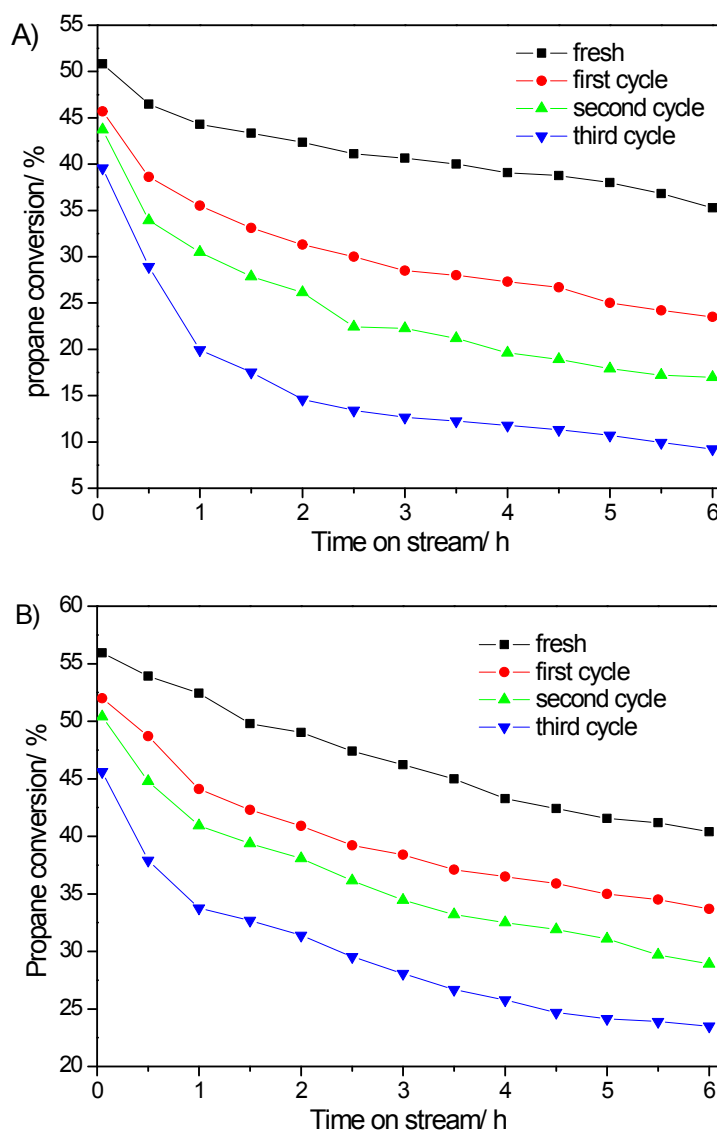

**Fig. S2** The performance comparison of (A) PtSnAl<sub>0</sub>/SBA-15 and (B) PtSnAl<sub>0.2</sub>/SBA-15 catalysts for propane dehydrogenation. Regeneration conditions: catalyst regeneration was performed by oxidative treatment using 10% O<sub>2</sub>/Ar (50 ml/min) for 4h at 500 °C. And then the catalyst was reduced in 10% H<sub>2</sub>/Ar (50 ml/min) for 4h at 500 °C.

### The results of FT-IR

FT-IR spectra of PtSnAl/SBA-15 catalysts are shown in Fig. 8. The band at 3420  $\text{cm}^{-1}$  can be assigned to the hydrogen-bonded Si–OH because of terminal Si–OH of Q<sub>2</sub> and adjacent Q<sub>3</sub>.<sup>1</sup> And the band at 1640  $\text{cm}^{-1}$  and 1080  $\text{cm}^{-1}$  corresponds to the O–H bending of adsorbed water and the Si–O asymmetrical stretching of Si–O–Si, respectively. The band at 808  $\text{cm}^{-1}$  is assigned to symmetric stretching vibration Si–O–Si of tetrahedral SiO<sub>4</sub>, while the band at 457  $\text{cm}^{-1}$  is attributed to the Si–O–Si bending mode.<sup>2</sup> Shah et al.<sup>3</sup> have reported that the band at 960  $\text{cm}^{-1}$  in Sn-SBA-15 should correspond to a vibration mode of SiO<sub>4</sub> perturbed by a neighboring SnO<sub>2</sub> or Sn=O (OH) group due to the presence of an adjacent Si–O<sup>δ-</sup>•••Sn<sup>δ+</sup>. The presence of this band in PtSnAl/SBA-15 samples is generally attributed to the formation of Si–O–M (Si–O–Sn or Si–O–Al) linkages in metallosilicates, which is consistent with the result of UV-Vis characterization.

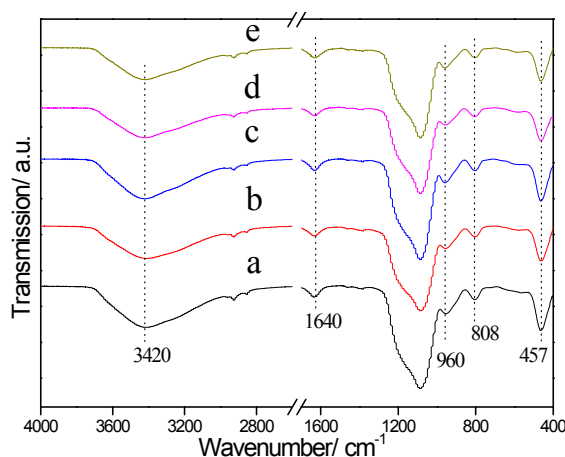

Fig. S3 FT-IR spectra of PtSnAl/SBA-15 catalysts: (a) PtSnAl<sub>0</sub>/SBA-15, (b) PtSnAl<sub>0.1</sub>/SBA-15, (c) PtSnAl<sub>0.2</sub>/SBA-15, (d) PtSnAl<sub>0.3</sub>/SBA-15, (e) PtSnAl<sub>0.4</sub>/SBA-15.

Table S1. A comparison of catalytic performance over different catalysts for propane dehydrogenation to produce propene

| Catalysts                                                      | C <sub>3</sub> H <sub>8</sub> in fed/% | Reaction temperature/°C | C <sub>3</sub> H <sub>8</sub> Conversion /% | C <sub>3</sub> H <sub>6</sub> Selectivity/% | References |
|----------------------------------------------------------------|----------------------------------------|-------------------------|---------------------------------------------|---------------------------------------------|------------|
| Pt-Sn/<br>Ce-γ-Al <sub>2</sub> O <sub>3</sub>                  | 14                                     | 576                     | 43.8                                        | 92.5                                        | 4          |
| Pt-Sn/<br>θ-Al <sub>2</sub> O <sub>3</sub>                     | 63                                     | 620                     | 40                                          | 93                                          | 5          |
| Pt-Sn/<br>SAPO-34                                              | 80                                     | 585                     | 23                                          | 94                                          | 6          |
| PtSn/ZnO/<br>MgAl <sub>2</sub> O <sub>4</sub>                  | 50                                     | 530                     | 39.9                                        | 98.4                                        | 7          |
| Cr <sub>2</sub> O <sub>3</sub> /Al <sub>2</sub> O <sub>3</sub> | 20                                     | 600                     | 26                                          | 70                                          | 8          |
| CrO <sub>x</sub> / Al <sub>2</sub> O <sub>3</sub>              | 10                                     | 550                     | 37                                          | 88                                          | 9          |
| Al-ZSM-5                                                       | 16                                     | 530                     | 19                                          | 19                                          | 10         |
| Fe-ZSM-5                                                       | 16                                     | 530                     | 16                                          | 7.2                                         | 10         |
| Cr-SBA-15                                                      | 10                                     | 580                     | 18                                          | 81                                          | 11         |
| PtSnAl/<br>SBA-15                                              | 17                                     | 590                     | 56                                          | 98                                          | This work  |

- 1 X. S. Zhao, G. Q. Lu, A. K. Whittaker, G. J. Millar and H. Y. Zhu, *J. Phys. Chem. B*, 1997, **101**, 6525.
- 2 M. A. Camblor, A. Corma and J. Perez-Pariente, *J. Chem. Soc., Chem. Commun.*, 1992, 589.
- 3 P. Shah, A. V. Ramaswamy, K. Lazar and V. Ramaswamy, *Appl. Catal. A: Gen.*, 2004, **273**, 239.
- 4 C. Yu, Q. Ge, H. Xu and W. Li, *Appl. Catal. A: Gen.*, 2006, **315**, 58.
- 5 F. T. Zangeneh, S. Mehrazma and S. Sahebdehfar, *Fuel Process. Technol.*, 2013, **109**, 118.
- 6 Z. Nawaz, X. Tang, Y. Wang and F. Wei, *Ind. Eng. Chem. Res.*, 2010, **49**, 1274.
- 7 Y. Wang, Y. Wang, S. Wang, X. Guo, S. M. Zhang, W. P. Huang and S. Wu *Catal. Lett.* **2009**, *132*, 472–479.
- 8 S. Derossi, G. Ferraris, S. Fremiotti, E. Garrone, G. Ghiotti, M.C. Campa and V. Indovina, *J. Catal.*, 1994, **148**, 36.
- 9 J. J. H. B. Sattler, I. D. Gonzalez-Jimenez, A. M. Mens, M. Arias, T. Visser and B. M. Weckhuysen, *Chem. Commun.*, 2013, **49**, 1518.
- 10 P. Serp, P. Kalck and R. Feurer, *Chem. Rev.*, 2002, **102**, 3085.
- 11 M. S. Kumar, N. Hammer, M. Rønning, A. Holmen, D. Chen, J. C. Walmsley and G. Øye, *J. Catal.*, 2009, **261**, 116.
